# Supplementary material for: Elevated Expression of SLC6A4 Encoding the Serotonin Transporter (SERT) in Gilles de la Tourette Syndrome
Source: MDPI journal article supplement (doi:10.3390/genes12010086), 2021-01-12
Supplement: s1 [file s1]

| Gene                  | Primer                                         | Sequence                                           |
|-----------------------|------------------------------------------------|----------------------------------------------------|
| SLC6A4<br>(I425V)     | Seq-<br>tail:PCR<br>FW                         | 5’-accactgcttactggcttatac: TGGAAGCCCCACCCTTCCTG-3’ |
|                       | Seq-<br>tail:PCR<br>RV                         | 5’-gaggggcaaacaacagatggc: CATCCTCCCACAGCCCATTTC-3’ |
|                       | PCR Master mix (30 µl pr. reaction)            |                                                    |
| SLC6A4<br>(I425V)     | 100 ng DNA                                     |                                                    |
|                       | 0.5 µl of each primer (10 µM)                  |                                                    |
|                       | 0.5 µl dNTP mix (2.5 mM of each)               |                                                    |
|                       | 6 µl 5x Q-solution                             |                                                    |
|                       | 3 µl 10x PCR buffer                            |                                                    |
|                       | 0.1 µl HotStarTaq® DNA polymerase              |                                                    |
|                       | 14.4 µl sterile H <sub>2</sub> O               |                                                    |
| PCR conditions        |                                                |                                                    |
| 95°C                  | 15m                                            |                                                    |
| 95°C                  | 1m                                             | x40 cycles                                         |
| 65°C                  | 1m                                             |                                                    |
| 72°C                  | 1m                                             |                                                    |
| 72°C                  | 7m                                             |                                                    |
|                       | Sequencing Master mix (pr. reaction)           |                                                    |
| SLC6A4<br>(I425V)     | 1-2 µl PCR product                             |                                                    |
|                       | 1 µl BigDye™ Terminator v3.1 Cycle Sequencing  |                                                    |
|                       | 1.5 µl BigDye™ Terminator 5x Sequencing buffer |                                                    |
|                       | 0.3 µl FW/RV sequencing primer                 |                                                    |
|                       | 5.2-6.2 µl sterile H <sub>2</sub> O            |                                                    |
| Sequencing conditions |                                                |                                                    |
| 98°C                  | 1m                                             |                                                    |
| 98°C                  | 10s                                            | X25 cycles                                         |
| 50°C                  | 5s                                             |                                                    |
| 60°C                  | 4m                                             |                                                    |
