# Supplementary material for: Elevated Expression of SLC6A4 Encoding the Serotonin Transporter (SERT) in Gilles de la Tourette Syndrome
Source: MDPI journal article supplement (doi:10.3390/genes12010086), 2021-01-12
Supplement: s1 [file s1]

CGGGATGGGGACGATGGGGAGGTGTCCGAGGTCAAGAGAAAGCGGCACGA  
GCAGACCCCTGTGTGCCGTCCTGTGGGCGCGGGGCGGCAGGGGAGGCGCA  
CACCTGCTCCTTTGTGCAGCCTCCCCCTCCCGCAAAGTTAAAGAGCAGG  
AAAGTCAGGATTCCCTCGCTCGGCCCTGCCCTGCCGGCTGCTCCGCGCTCC  
GCTCCTCCCTGCGAGCGTGTGTGTGTGTGTGGGGGTCCCTCCCTCCTGGC  
TCTGGGGTCGGGCGCGCACCCCGCCCCGTAGCGCGGCCCTCCCTGGCGA  
GCGCAACCCCATCCAGCGGGAGCGCGGAGCCGCGGCCGCGGGGAAGCATT  
AAGTTTATTCGCCTCAAAGTGACGCAAAAATTCTTCAAGAGCTCTTTGGC  
GGCGGCTATCTAGAGATCAGACCATGTGAGGGCCCGCGGGTACAAATACG  
GCCGCGCCGCGCGCCCCTCCGCACAGCCAGCGCCGCGGGTGCCTCGAGGG  
CGCGAGGCCAGCCCGCCTGCCAGCCCGGGACCAGCCTCCCCGCGCAGCC  
TGGCAGGTGGGTCCGCTTTTCCTCTCCGCCTCGAACCACGTTTCTTTCC  
AGACCTTCTTCCCCGCCTCGGGGAGGGGATAGAACCGCTGCGCCCCACC  
GCCCTGCGAGGAGGCGAGGAGGTGCATGCGCCCCAGCGGTGGGCGCCGGA  
TCCTGCCCCTGCGCCCTCCACGCTCAGCAAGAGCCAGAGCTGAAGCTGAC  
CGGCCAGAGTGGGAGACGAGGAACGTGGAGTGCTCGAAGTGGGCGGGCG
