# Supplementary material for: Elevated Expression of SLC6A4 Encoding the Serotonin Transporter (SERT) in Gilles de la Tourette Syndrome
Source: MDPI journal article supplement (doi:10.3390/genes12010086), 2021-01-12
Supplement: s1 [file s1]

| Analysis                    | GTS individuals |         | Controls |
|-----------------------------|-----------------|---------|----------|
|                             | GTS-Only        | GTS+OCD |          |
| <b>Total</b>                | 50              | 22      | 87       |
| <b>Genotyping</b>           |                 |         |          |
| 5-HTTLPR                    | 50              | 22      | 87       |
| 5-HTTLPR/rs25531/rs25532    | 27              | 14      | 40       |
| Ile425Val                   | 50              | 22      | 51       |
| <b>Expression analyses</b>  |                 |         |          |
| <i>SLC6A4</i>               | 43              | 14      | 36       |
| 5-HTTLPR/rs25531/rs25532    | 23              | 9       | 20       |
| <b>Methylation analysis</b> |                 |         |          |
| <i>SLC6A4</i>               | 50              | 21      | 87       |
