# Supplementary material for: Elevated Expression of SLC6A4 Encoding the Serotonin Transporter (SERT) in Gilles de la Tourette Syndrome
Source: MDPI journal article supplement (doi:10.3390/genes12010086), 2021-01-12
Supplement: s1 [file s1]

|                                                                                |      |
|--------------------------------------------------------------------------------|------|
| <b>cDNA Synthesis Master mix</b>                                               |      |
| X µl sterile H <sub>2</sub> O, depending on [RNA], to make final volume 20 µl. |      |
| 5 µl 10X RT buffer                                                             |      |
| 2 µl 25X dNTP Mix (100 mM)                                                     |      |
| 5 µl 10X Random Primer                                                         |      |
| 2.5 µl Multiscribe RT 50U/µl                                                   |      |
| 1 µg total RNA                                                                 |      |
| <b>Thermocycling conditions</b>                                                |      |
| 25°C                                                                           | 10m  |
| 37°C                                                                           | 120m |
| 85°C                                                                           | 5m   |
