# Supplementary material for: Elevated Expression of SLC6A4 Encoding the Serotonin Transporter (SERT) in Gilles de la Tourette Syndrome
Source: MDPI journal article supplement (doi:10.3390/genes12010086), 2021-01-12
Supplement: s1 [file s1]

GGCGTTGCCGCTCTGAATGC CAGCACCTAACCCCTAATGTCCCTACTGCA  
GCCCTCCCAGCATCCCCCCTGCAACCTCCCAGCAACTCCCTGTACCCCTC  
CTAGGATCGCTCCTGCATCCCCATTATCCCCCCTTCACCCCTCGCGGC  
ATCCCCCCTGCACCCCA GCATCCCCC TGCAGCCCCCCCAGCATCTCCC  
CTGCACCCCCAGCATCCCCC TGCAGCCCTTCCAGCATCCCCCTGCACCT  
CTCCCAGGATCTCCCCTGCAACCCCCATTATCCCCCCTGCACCCCTCGCA  
GTATCCCCCCTGCACCCCCCAGCATCCCCCATGCACCCCCGG CATCCCC  
CCTGCACCCCTCCAGCATTCTCCTTGCACCCTACCAGTATTCCCCCGCAT  
CCCGGCCTCCAAGCCTCCCGCCACCTTGCGGTCCCCGCCCTGGCGTCTA  
GGTGGCACCAGAATCCCGCGCGGACTCCACCCGCTGGGAGCTGCCCTCGC  
TTGCCC GTGGTTGTCCAGCTCAGTCCCTC
