# Supplementary material for: Elevated Expression of SLC6A4 Encoding the Serotonin Transporter (SERT) in Gilles de la Tourette Syndrome
Source: MDPI journal article supplement (doi:10.3390/genes12010086), 2021-01-12
Supplement: s1 [file s1]

| Gene           | Primer                             | Sequence                       |
|----------------|------------------------------------|--------------------------------|
| SLC6A4         | PCR F                              | GTTTTAGGAAGAAAGAGAGAGTAGTT     |
|                | PCR R                              | [BIO]ATCCTAACTTTCCTACTCTTTAACT |
|                | Seq 1                              | GGAAGATGGGGAGGTGTT             |
|                | Seq 2                              | GGTAAGAGTAGATTTTTGTGTG         |
|                | PCR Modifications                  |                                |
| SLC6A4         | 0.15μM of each primer              |                                |
|                | 1μl MgCl <sub>2</sub> Per reaction |                                |
| PCR conditions |                                    |                                |
| 95°C           | 15m                                |                                |
| 94°C           | 30s                                | x45 cycles                     |
| 56°C           | 30s                                |                                |
| 72°C           | 30s                                |                                |
| 72°C           | 10m                                |                                |
