# Supplementary material for: Elevated Expression of SLC6A4 Encoding the Serotonin Transporter (SERT) in Gilles de la Tourette Syndrome
Source: MDPI journal article supplement (doi:10.3390/genes12010086), 2021-01-12
Supplement: s1 [file s1]

| Gene                  | Primer                                         | Sequence                                                     |
|-----------------------|------------------------------------------------|--------------------------------------------------------------|
| SLC6A4 (5-HTTLPR)     | Seq-tail:PCR FW                                | 5'- <b>accactgcttactggcttatc</b> :GGCGTTGCCGCTCTGAATGC-3'    |
|                       | Seq-tail:PCR RV                                | 5'- <b>gaggggcaaacaacagatggc</b> :GAGGGACTGAGCTGGACAACCAC-3' |
|                       | PCR Master mix (30 µl pr. reaction)            |                                                              |
| SLC6A4 (5-HTTLPR)     | 75 ng DNA                                      |                                                              |
|                       | 2.625 µl of each primer (10 µM)                |                                                              |
|                       | 2.6 µl dNTP mix (2.5 mM of each)               |                                                              |
|                       | 6 µl 5x Q-solution                             |                                                              |
|                       | 3 µl 10x PCR buffer                            |                                                              |
|                       | 0.15 µl HotStarTaq® DNA polymerase             |                                                              |
|                       | 11.7 µl sterile H2O                            |                                                              |
| PCR conditions        |                                                |                                                              |
| 95°C                  | 15m                                            |                                                              |
| 95°C                  | 30s                                            | X35 cycles                                                   |
| 68°C                  | 30s                                            |                                                              |
| 72°C                  | 1m 30s                                         |                                                              |
| 72°C                  | 10m                                            |                                                              |
|                       | Sequencing Master mix (pr. reaction)           |                                                              |
| SLC6A4 (5-HTTLPR)     | 2-3 µl PCR product                             |                                                              |
|                       | 1 µl BigDye™ Terminator v3.1 Cycle Sequencing  |                                                              |
|                       | 1.5 µl BigDye™ Terminator 5x Sequencing buffer |                                                              |
|                       | 0.3 µl FW/RV sequencing primer                 |                                                              |
|                       | 4.2-5.2 µl sterile H2O                         |                                                              |
| Sequencing conditions |                                                |                                                              |
| 98°C                  | 1m                                             |                                                              |
| 98°C                  | 10s                                            | X25 cycles                                                   |
| 50°C                  | 5s                                             |                                                              |
| 60°C                  | 4m                                             |                                                              |
