# Supplementary material for: Elevated Expression of SLC6A4 Encoding the Serotonin Transporter (SERT) in Gilles de la Tourette Syndrome
Source: MDPI journal article supplement (doi:10.3390/genes12010086), 2021-01-12
Supplement: s1 [file s1]

| Gene                                                          | Probe                               |            |
|---------------------------------------------------------------|-------------------------------------|------------|
| <i>SLC6A4</i>                                                 | #Hs00169010_m1 (Applied Biosystems) |            |
| <i>GUSB</i>                                                   | #Hs00939627_m1 (Applied Biosystems) |            |
| qPCR Master mix (20 µl pr. reaction)                          |                                     |            |
| 9 µl cDNA (1.79 ng/ul)                                        |                                     |            |
| 10 µl 2x TaqMan Universal PCR Master mix (Applied Biosystems) |                                     |            |
| 1 µl TaqMan probe (Applied Biosystems)                        |                                     |            |
| qPCR conditions                                               |                                     |            |
| 50°C                                                          | 2m                                  |            |
| 95°C                                                          | 10m                                 |            |
| 95°C                                                          | 15s                                 | X40 cycles |
| 60°C                                                          | 1m                                  |            |
