# Supplementary figures and images for: Elevated Expression of SLC6A4 Encoding the Serotonin Transporter (SERT) in Gilles de la Tourette Syndrome
Source: MDPI journal article supplement (doi:10.3390/genes12010086), 2021-01-12

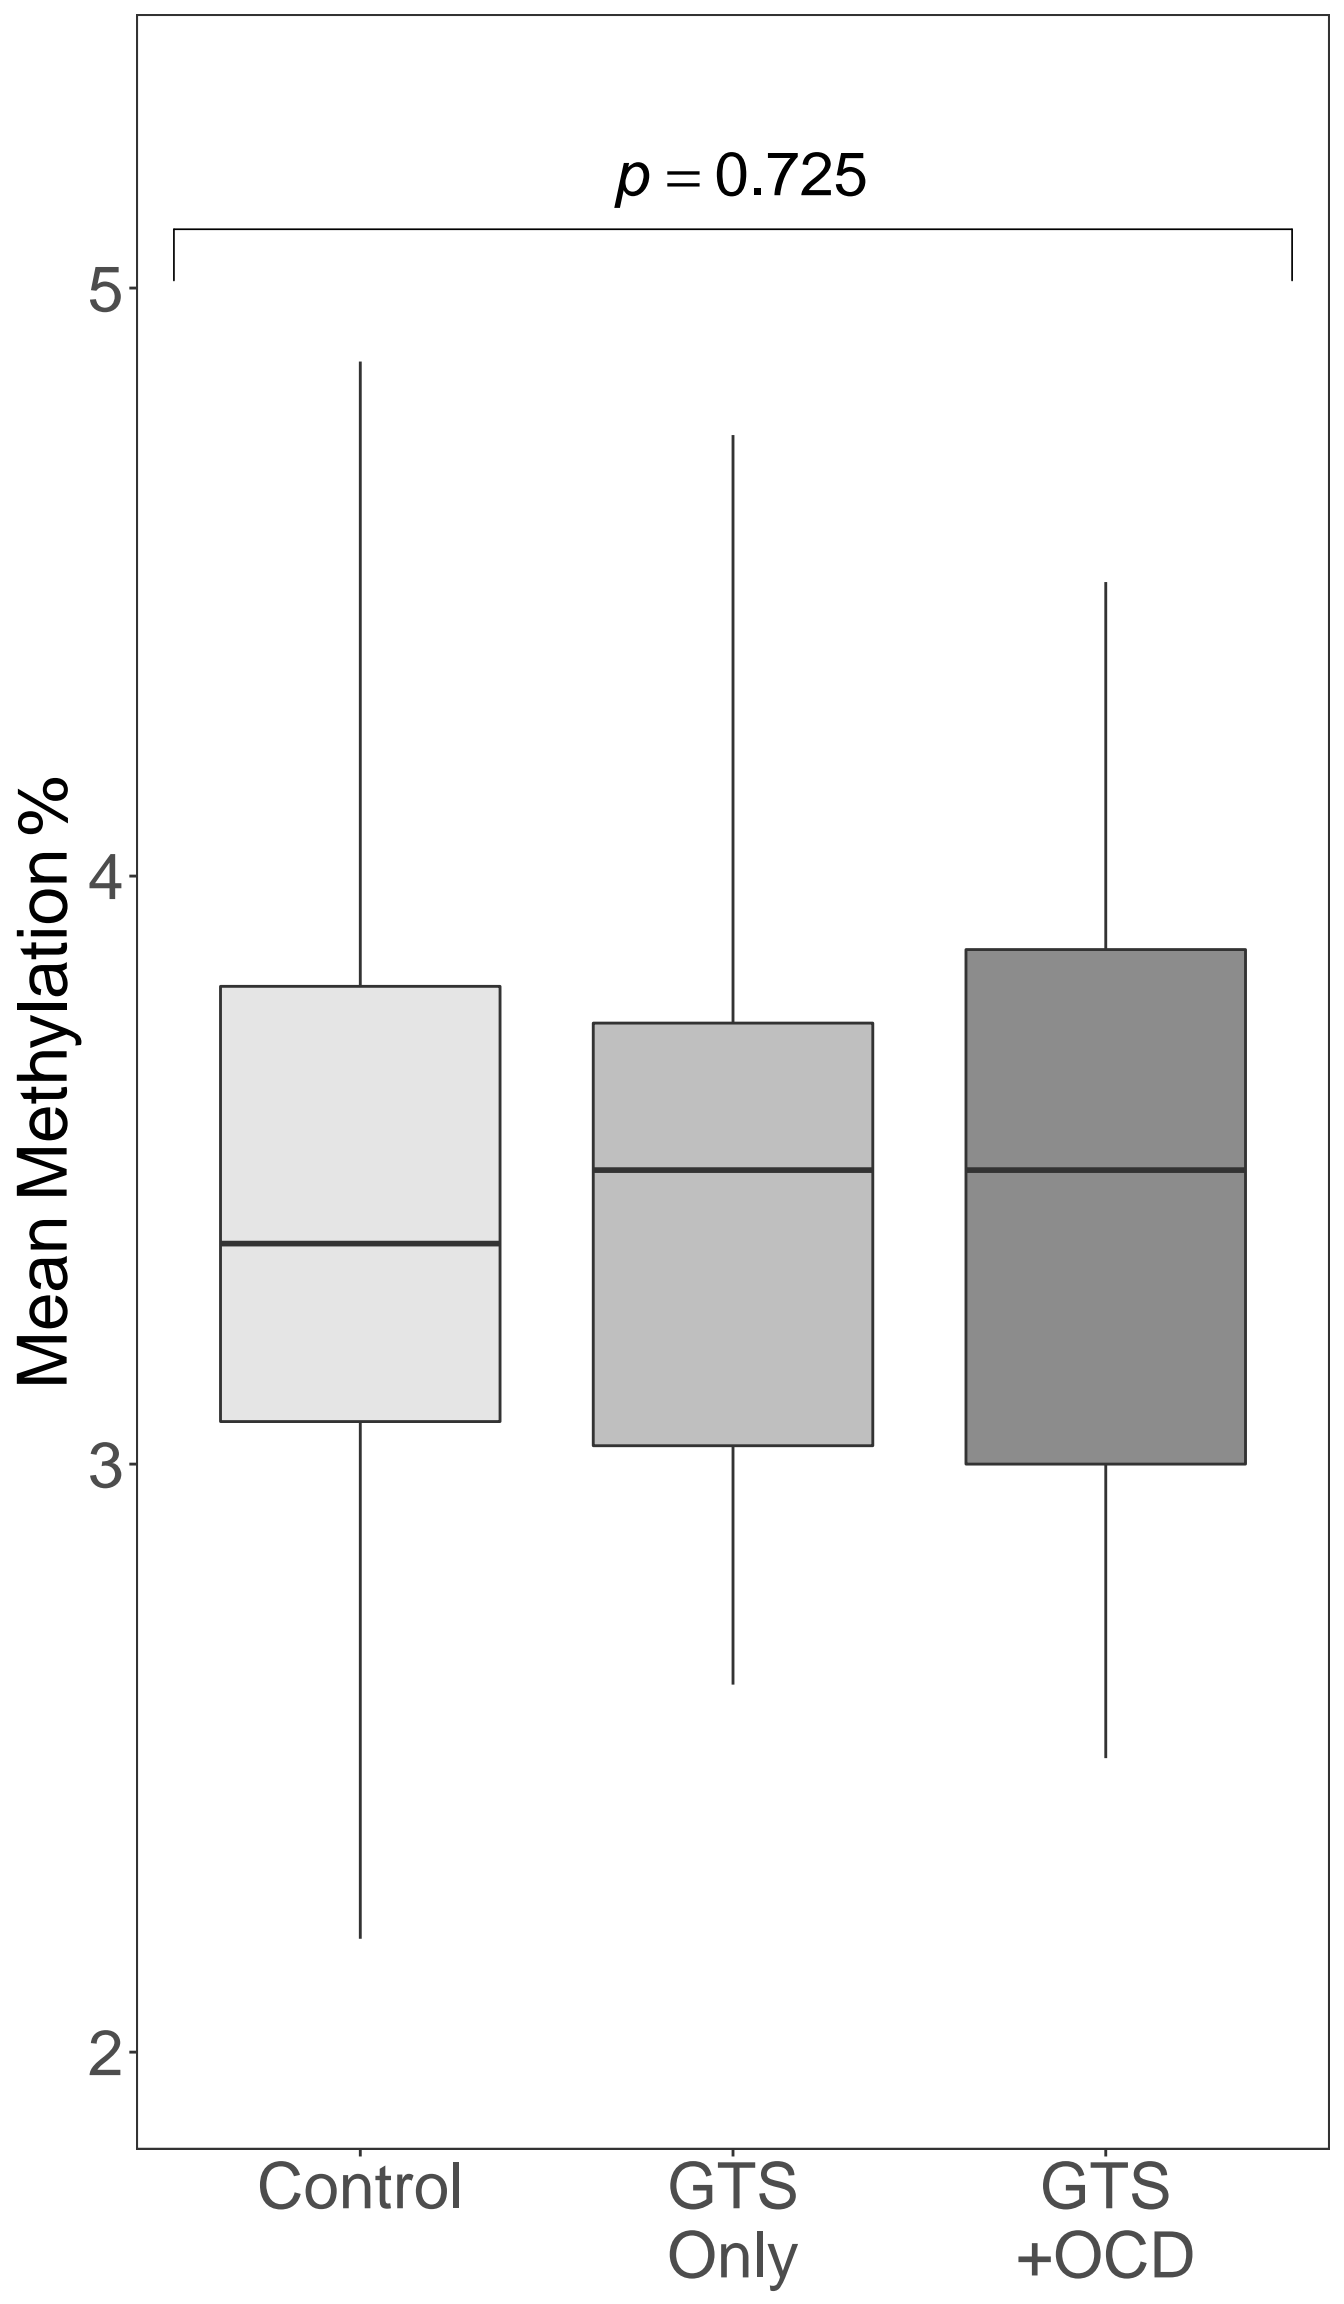

Supplement: s1 [file s1]

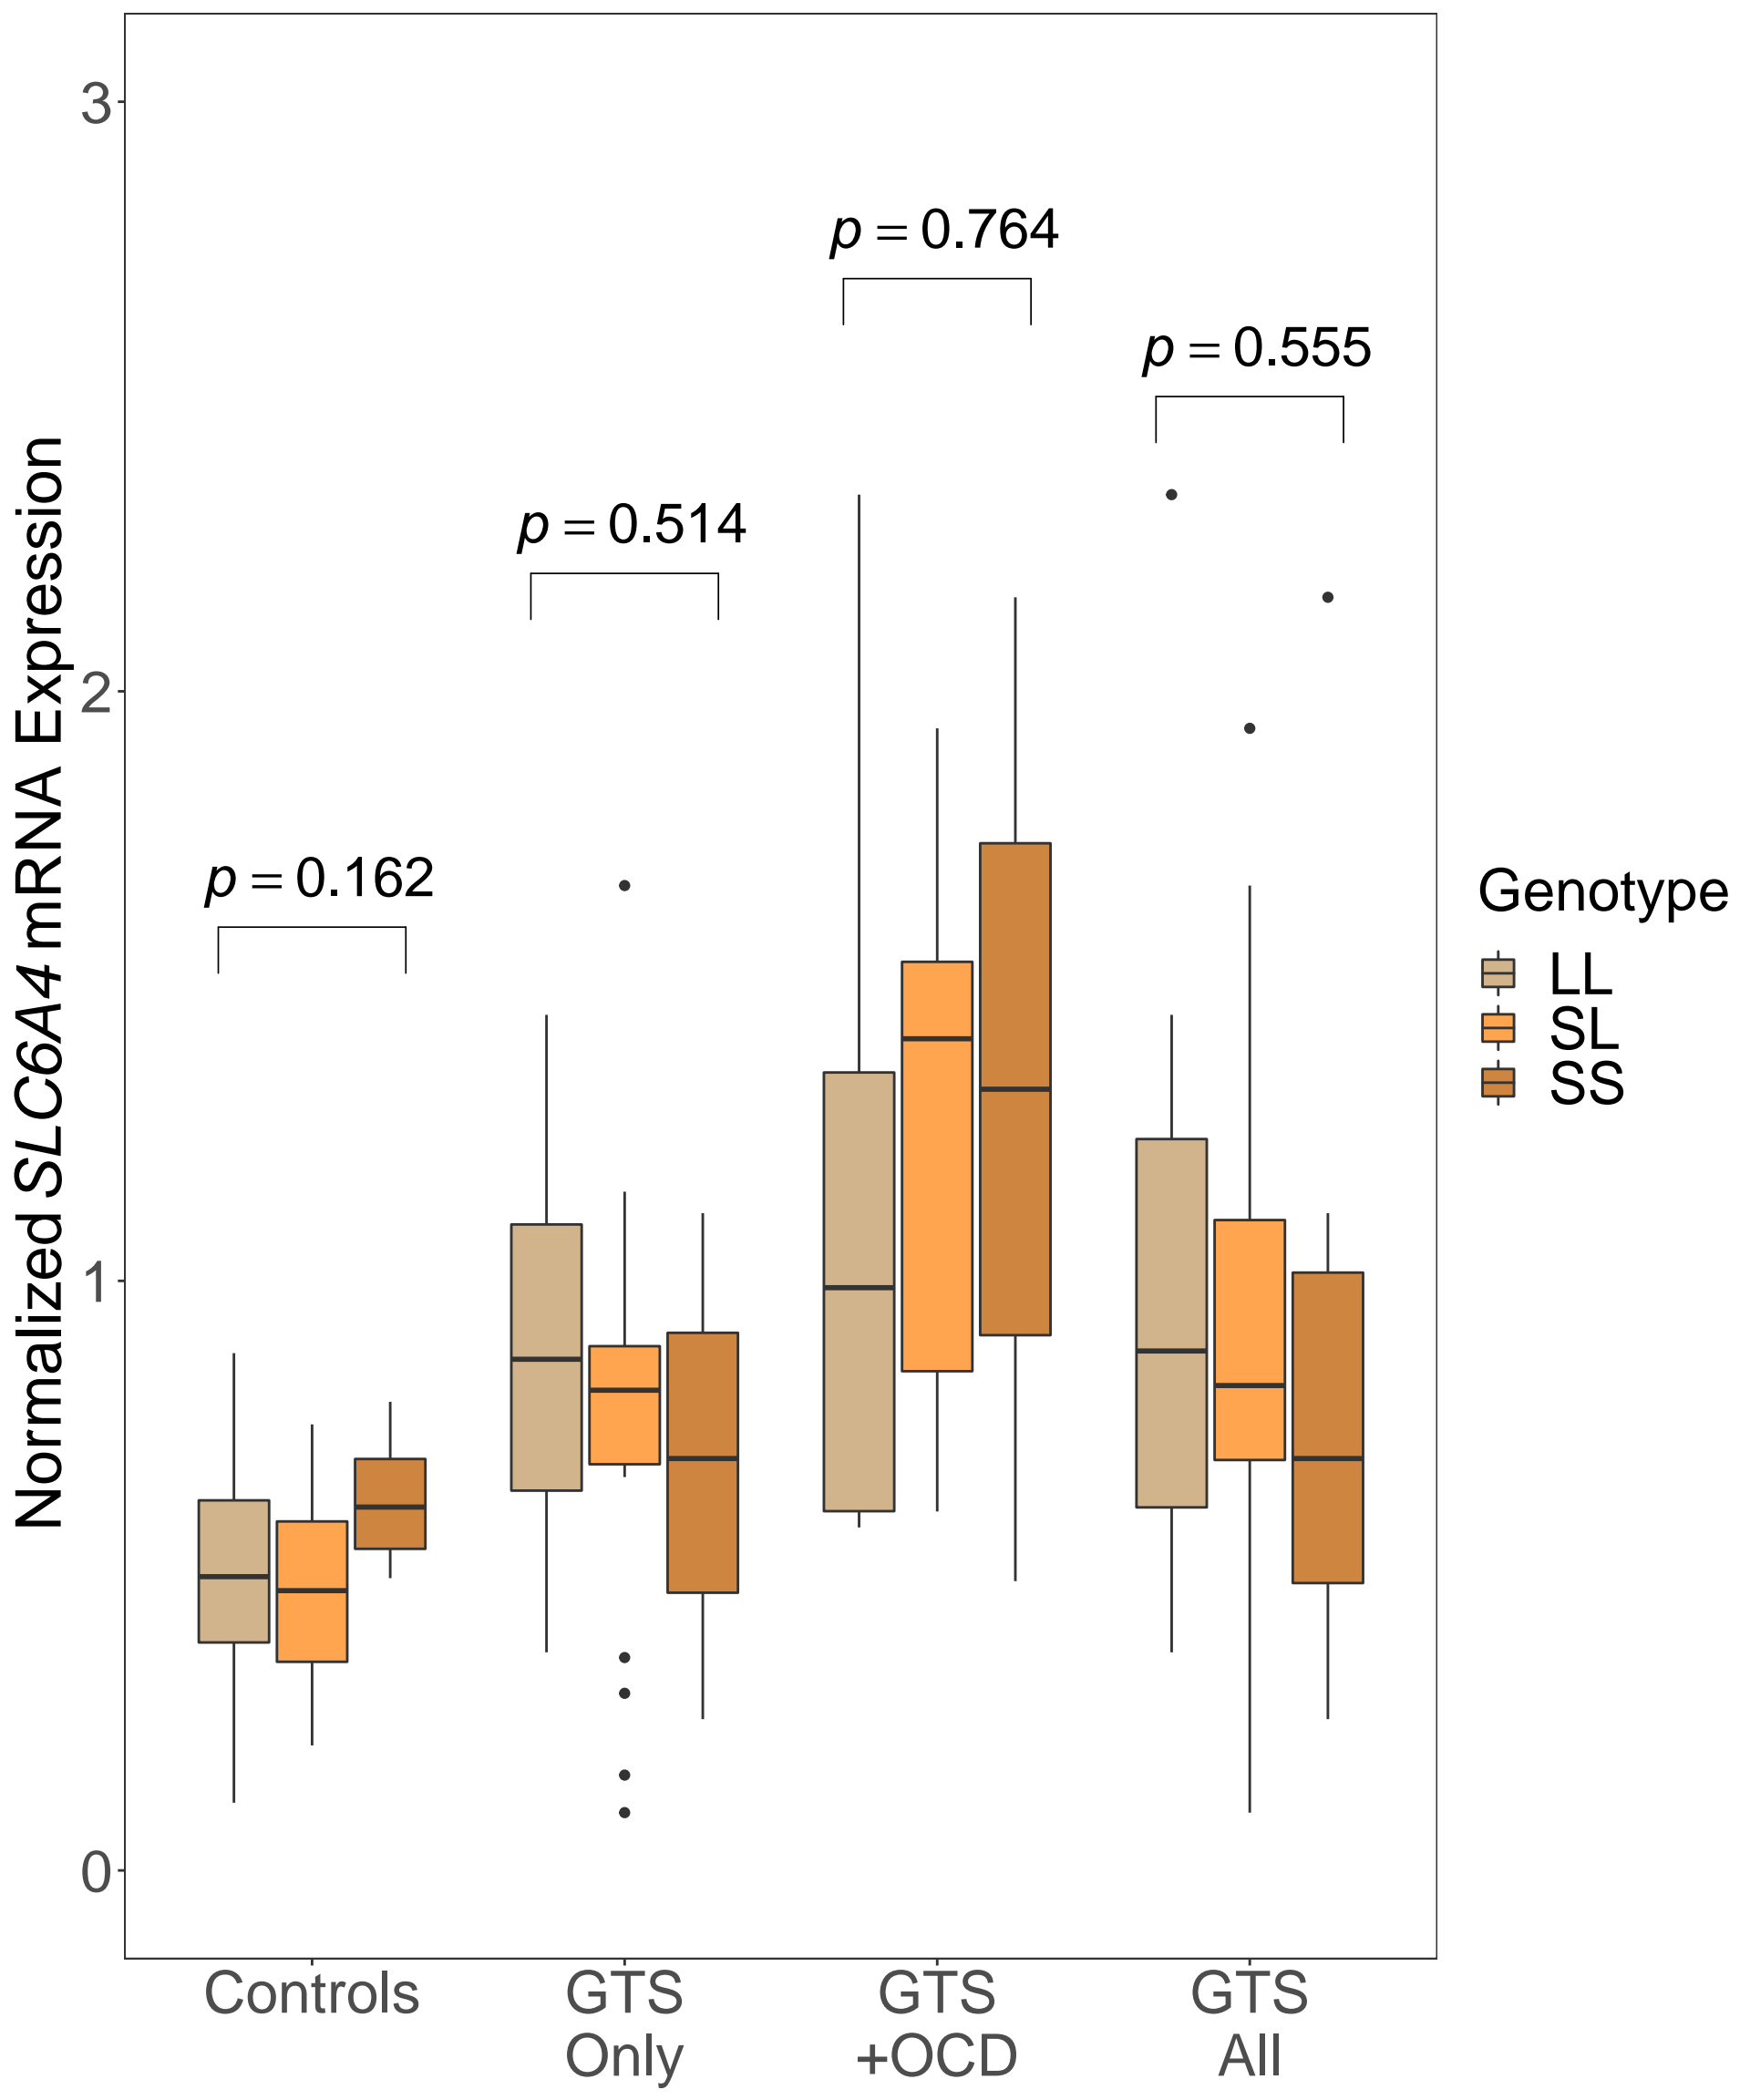

Supplement: s1 [file s1]
